# Supplementary material for: Contribution of nuclear BCL10 expression to tumor progression and poor prognosis of advanced and/or metastatic pancreatic ductal adenocarcinoma by activating NF-κB-related signaling
Source: PubMed Central journal article supplement (PMC8375138; doi:10.1186/s12935-021-02143-z), 2021-08-19
Supplement: 12935_2021_2143_MOESM1_ESM.pdf [file 12935_2021_2143_MOESM1_ESM.pdf]

## BCL10 mRNA sequence

atggagcc caccgcaccg tcctcaccg aggaggacct  
cactgaagtg aagaaggacg ccttagaaaa tttacgtgta  
tacctgtgtg agaaaatcat agctgagaga cattttgatc  
atctacgtgc aaaaaaata ctcagtagag aagacactga  
agaaatttct tgtcgaacat caagtagaaa aagggctgga  
aaattgtag actacttaca ggaaaacca aaaggtctg  
acacccttgt tgaatctatt cggcgagaaa aaacacagaa  
cttctgata cagaagatta cagatgaagt gctgaaactt  
agaaatataa aactagaaca tctgaaagga ctaaagtga  
gcagttgtga acctttcca gatggagcca cgaacaacct  
ctccagatca aattcagatg agagtaattt ctctgaaaa  
ctgagggcat ccactgtcat gtaccatcca gaaggagaat  
ccagcacgac gcccttttt tctactaatt cttctctgaa  
ttgcctggt ctagaagtag gcagaactga aaataccatc  
ttctttcaa ctacacttc cagacctggg gaccagggg  
ctcctcctt gccaccagat ctacagttag aagaagaagg  
aactgtgca aactctagtg agatgtttct tcccttaaga  
tc**acgtactg tttcacgaca atg**<sub>a</sub>

## BCL10 amino acid sequence

MEPTAPSLTEEDLTEVKKDALENLRVYLCE  
KIIAERHFDHLRAKKILSREDTEEISCRTSSR  
KRAGKLLDYLQENPKGLDTLVESIRREKTQ  
NFLIQKITDEVKLRNIKLEHLKGLKCSSCE  
PFPDGATNNLSRSNSDESNFSEKLRASTV  
MYHPEGESSTTPFFSTNSSLNLPVLEVGRT  
ENTIFSSTTLPRPGDPGAPPLPPDLQLEEE  
GTCANSSEMFLPLR**SRTVSRQ**

Ser<sup>231</sup>

Knockdown

shRNA Target Sequence:  
**ACGTACTGTTTCACGACAATG**

Supplementary Figure 1
